# Supplementary material for: PT-112 Induces Mitochondrial Stress and Immunogenic Cell Death, Targeting Tumor Cells with Mitochondrial Deficiencies
Source: MDPI journal article supplement (doi:10.3390/cancers14163851), 2022-08-09
Supplement: s1 [file s1]

## Supplementary material

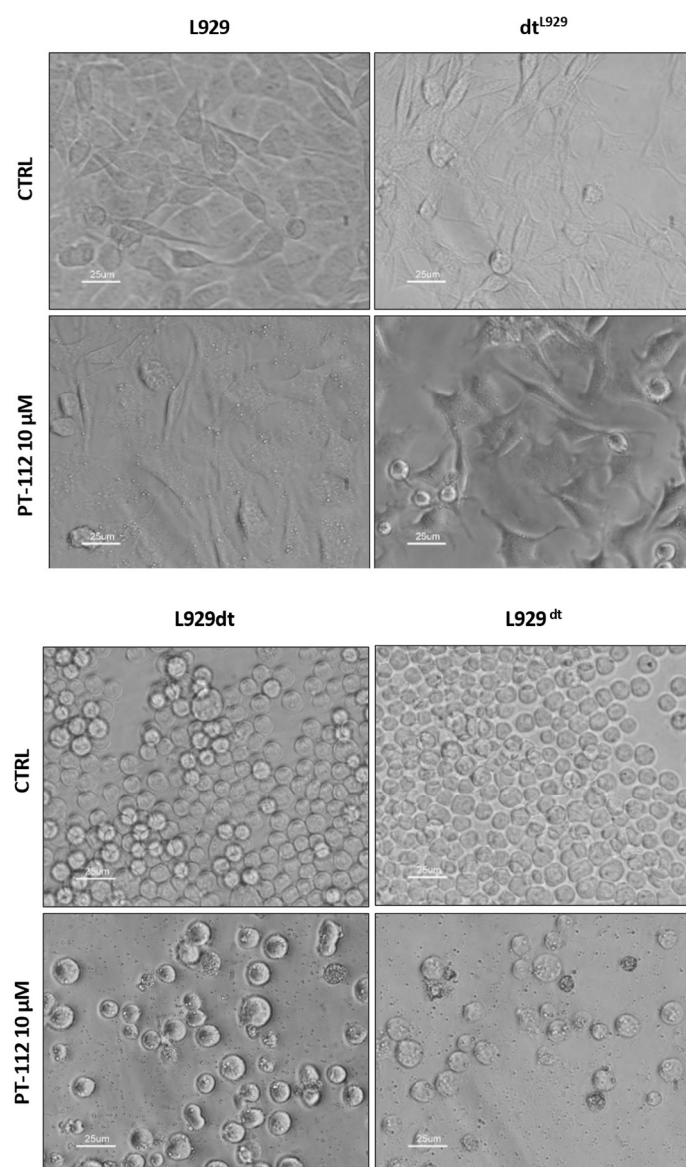

**Figure S1. Cell morphology after PT-112 treatment.** Phase-contrast micrographs of control cells (CTRL) and cells treated or not (CTRL) with 10 μM PT-112 for 72h.

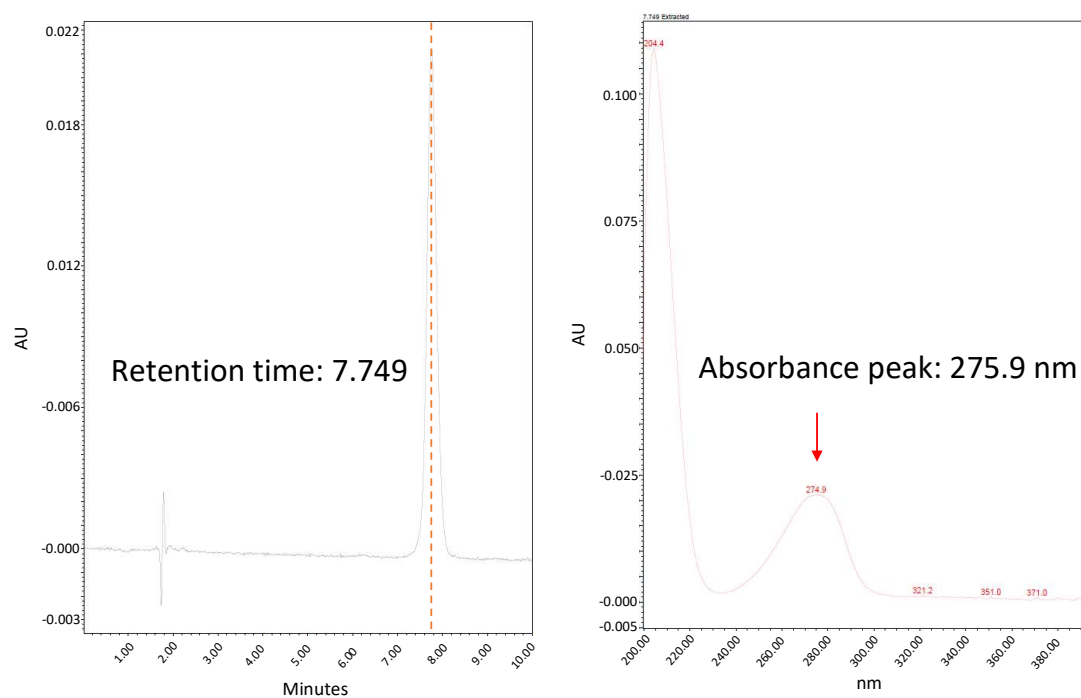

**Figure S2. HPLC chromatogram (left panel) and absorbance spectrum of commercial CoQ10 (right panel).** Concentrated sample of commercial CoQ10 was prepared and analyzed by HPLC. Retention time (7.749 min) and absorbance peak (274.9 nm) were used as a reference in order to identify the CoQ10 peak in the samples.

**Figure S3. Uncropped blots shown in the Figures of the manuscript.**

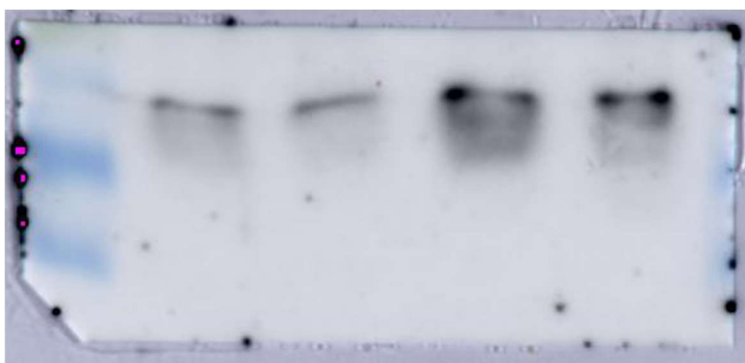

Anti-LC3BI/LC3BII immunoblot on L929 cells shown in Figure 4C

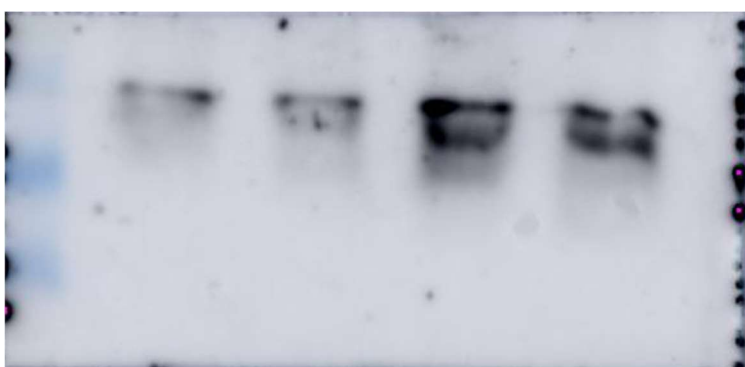

Anti-LC3BI/LC3BII immunoblot on dt<sup>L929</sup> cells shown in Figure 4C

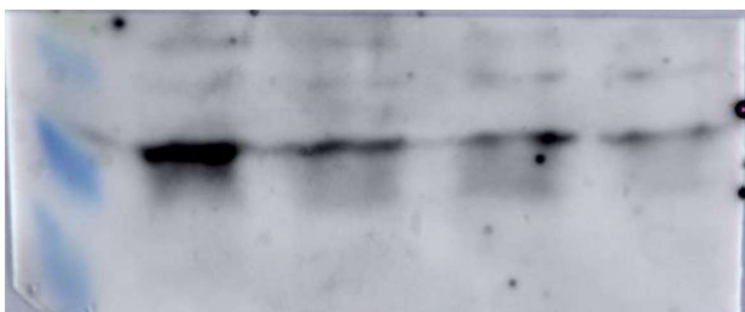

Anti-LC3BI/LC3BII immunoblot on L929dt cells shown in Figure 4C

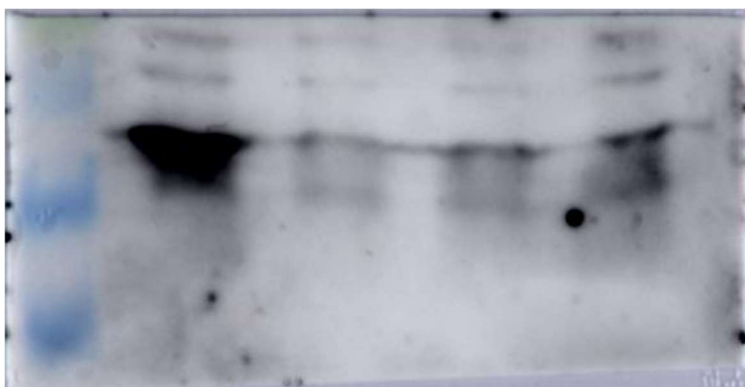

Anti-LC3BI/LC3BII immunoblot on L929<sup>dt</sup> cells shown in Figure 4C

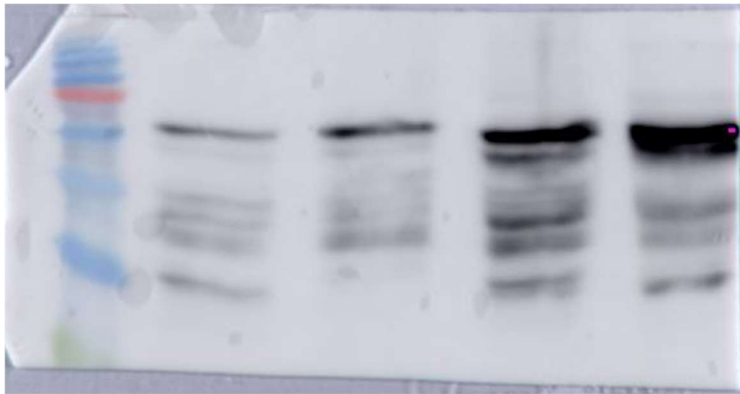

Anti-p62 immunoblot on L929 cells shown in Figure 4C

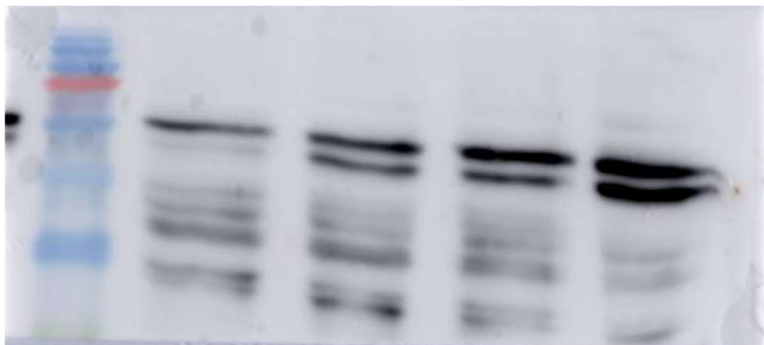

Anti-p62 immunoblot on dt<sup>L929</sup> cells shown in Figure 4C

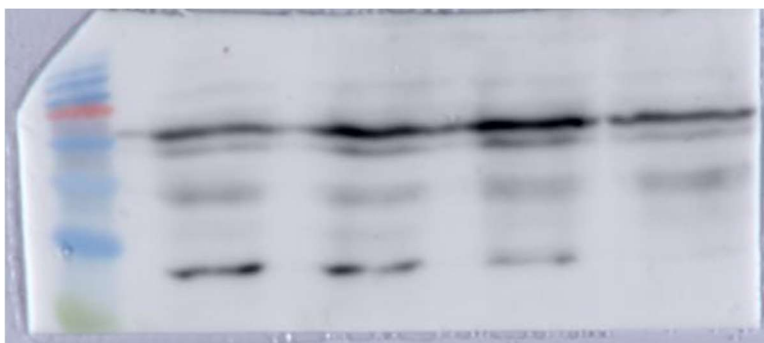

Anti-p62 immunoblot on L929dt cells shown in Figure 4C

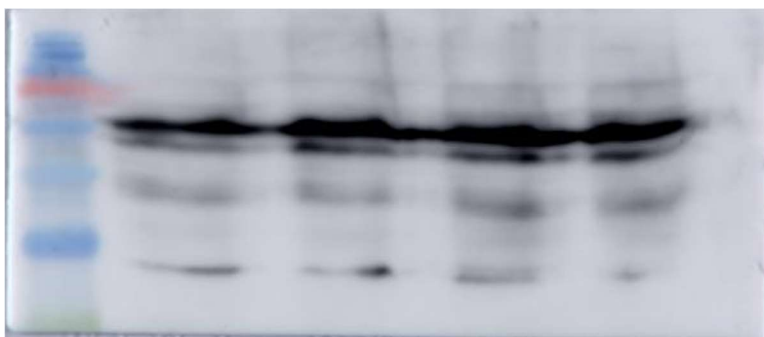

Anti-p62 immunoblot on L929<sup>dt</sup> cells shown in Figure 4C

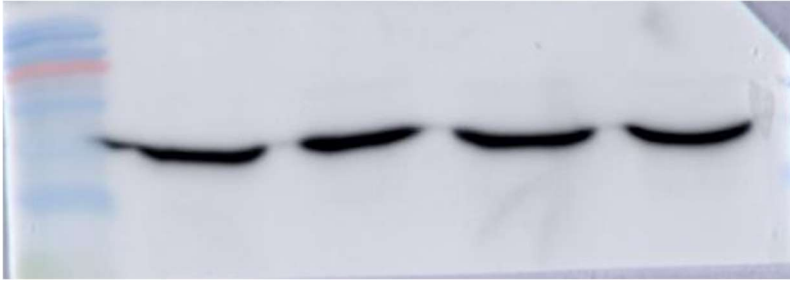

Anti-tubulin immunoblot on L929 cells shown in Figure 4C

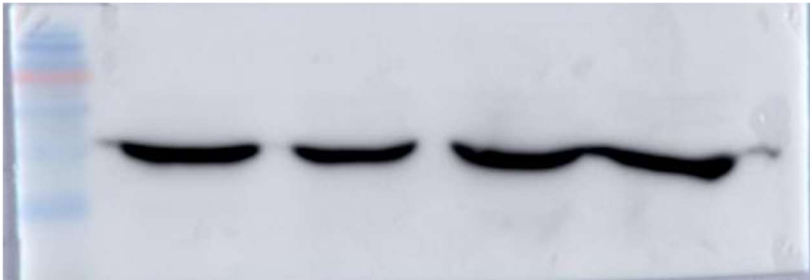

Anti-tubulin immunoblot on dt<sup>L929</sup> cells shown in Figure 4C

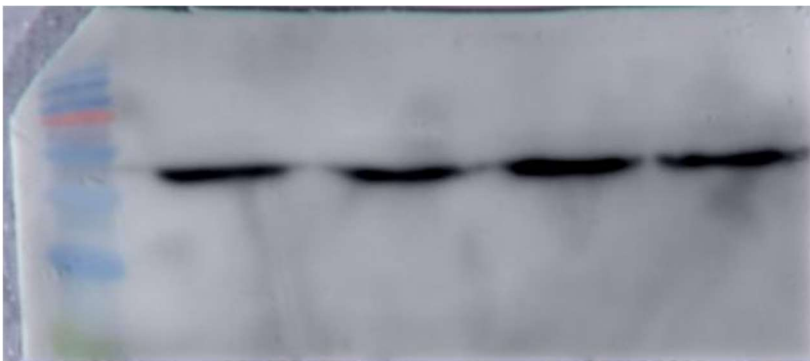

Anti-tubulin immunoblot on L929dt cells shown in Figure 4C

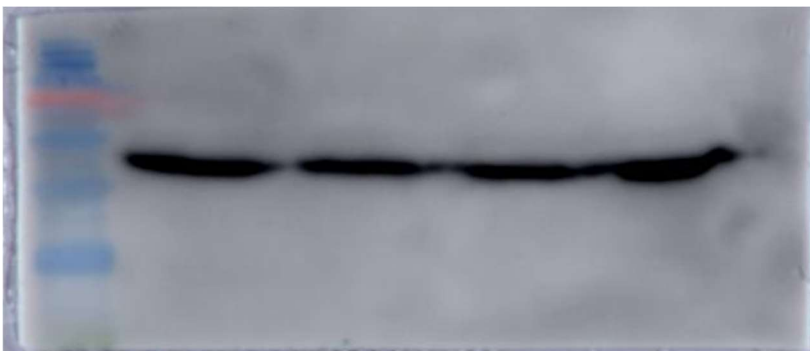

Anti-tubulin immunoblot on L929<sup>dt</sup> cells shown in Figure 4C

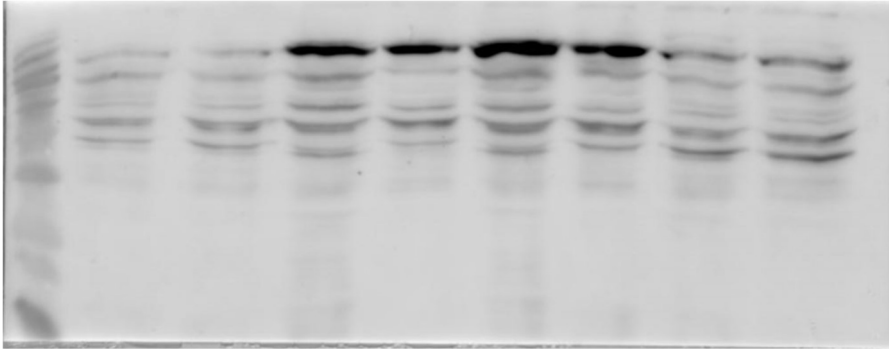

Anti-HIF-1 $\alpha$  immunoblot shown in Figure 11

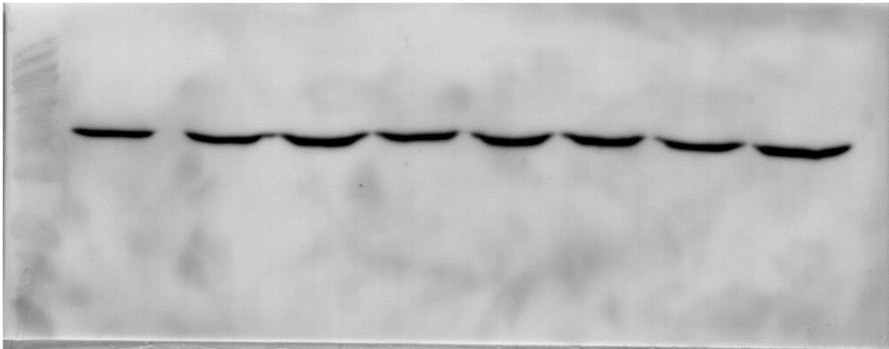

Anti- $\beta$ -actin immunoblot shown in Figure 11
